# Supplementary material
Source: PubMed Central journal article supplement (PMC3251111)
Supplement: 1111149108_pnas.201111149SI.pdf [file 1111149108_pnas.201111149SI.pdf]

# Supporting Information

Mari et al. 10.1073/pnas.1111149108

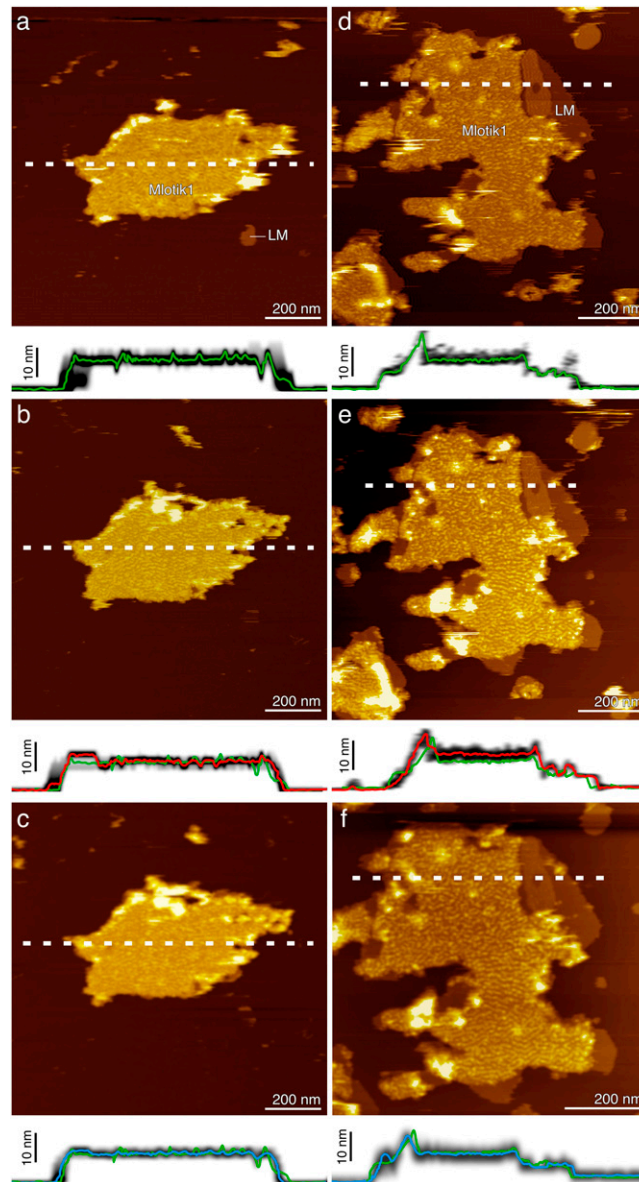

**Fig. S1.** Overview AFM topographs of wt and mutant R348A MlotiK1 reconstituted into membranes of *E. coli* polar lipid extract. Overviews of wt MlotiK1 channel (a–c) and mutant MlotiK1 channel (d–f) membranes prepared in the presence of cAMP (see *Materials and Methods*), and adsorbed and imaged in the presence of 200  $\mu$ M cAMP (a) and 900  $\mu$ M cAMP (d) after removing cAMP (b and e), and after the readdition of 200  $\mu$ M cAMP (c) or 900  $\mu$ M cAMP (f). Lipid membranes (LM) and densely packed MlotiK1 are clearly visible. Below each topograph is the height profile taken along the dashed lines. Every height profile represents the superimposition of 10 height lines and shows the height average (colored line) and height variation (gray shading). In the presence of cAMP, lipid membranes protruded  $4.0 \pm 0.5$  nm (average  $\pm$  SD;  $n = 81$ ), wt MlotiK1 membrane patches protruded  $10.2 \pm 0.8$  nm ( $n = 176$ ) and mutant MlotiK1 patches protruded  $10.1 \pm 0.8$  nm ( $n = 156$ ) from the supporting mica. Imaging the same membranes in the absence of cAMP revealed no change in the appearance and height ( $10.3 \pm 0.6$  nm;  $n = 163$ ) of wt MlotiK1 membranes (compare with Fig. S4). In the absence of cAMP, mutant MlotiK1 membranes increased their height from  $10.1 \pm 0.8$  nm (d) to  $11.8 \pm 0.8$  nm ( $n = 147$ ) (e). For better comparison, we superimposed the average height lines recorded in presence of cAMP (green lines) and height lines recorded in absence of cAMP (red lines) (e). Upon readding cAMP, wt MlotiK1 membranes showed no change in height (c), whereas mutant MlotiK1 membranes reduced their height back to that measured initially in the presence of cAMP (f). For better comparison, we superimposed the average height lines recorded in presence of readded cAMP (blue lines) and height lines recorded before depletion of cAMP (green lines) (f). Imaging buffers were 50 mM KCl and 20 mM Tris-HCl (pH 7.5) with cAMP concentrations as indicated. All heights for wt and mutant MlotiK1 measured in the presence of cAMP, in the absence of cAMP, and upon readding cAMP are given in Table S1.  $n$  gives the number of lipid membranes or MlotiK1 membranes measured.

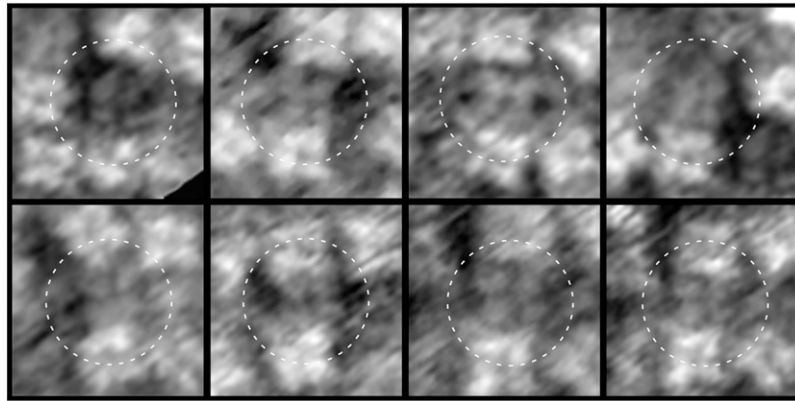

**Fig. S2.** Gallery of high-resolution AFM topographs of the extracellular surface of the wt MlotiK1 channel. AFM topographs revealed shallow tetrameric surfaces (outlined by dashed circles) between the highly protruding cytoplasmic surfaces of MlotiK1 channels. Different channels are shown at slightly different magnifications. The shallow tetramers protrude  $1.8 \pm 0.5$  nm ( $n = 48$ ) from the lipid bilayer, whereas the highly protruding tetramers protrude  $3.2 \pm 0.5$  nm ( $n = 100$ ) from the lipid membrane. On average, both the shallow and the highly protruding tetramers have an outer diameter of  $\sim 8$ – $10$  nm. AFM topographs show a gray level range corresponding to a vertical height scale of  $4.5$  nm. Imaging buffer was  $50$  mM KCl,  $200$   $\mu$ M cAMP, and  $20$  mM Tris-HCl (pH 7.5).  $n$  gives the number of MlotiK1 tetramers measured.

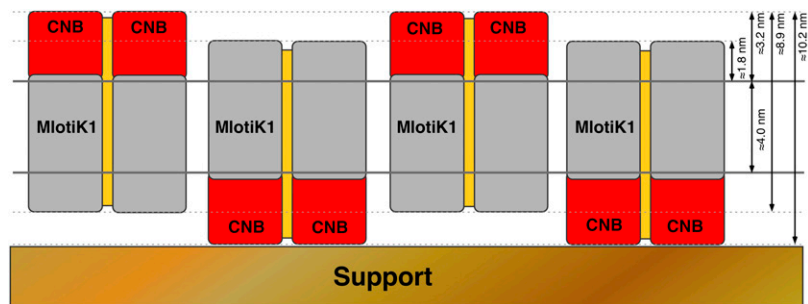

**Fig. S3.** Measured heights of the reconstituted wt MlotiK1 membrane. Schematic drawing showing a side view of the reconstituted MlotiK1 channels in an up-and-down orientation. Height values are average values measured from wt MlotiK1 in the presence of  $50$  mM KCl,  $200$   $\mu$ M cAMP, and  $20$  mM Tris-HCl (pH 7.5).





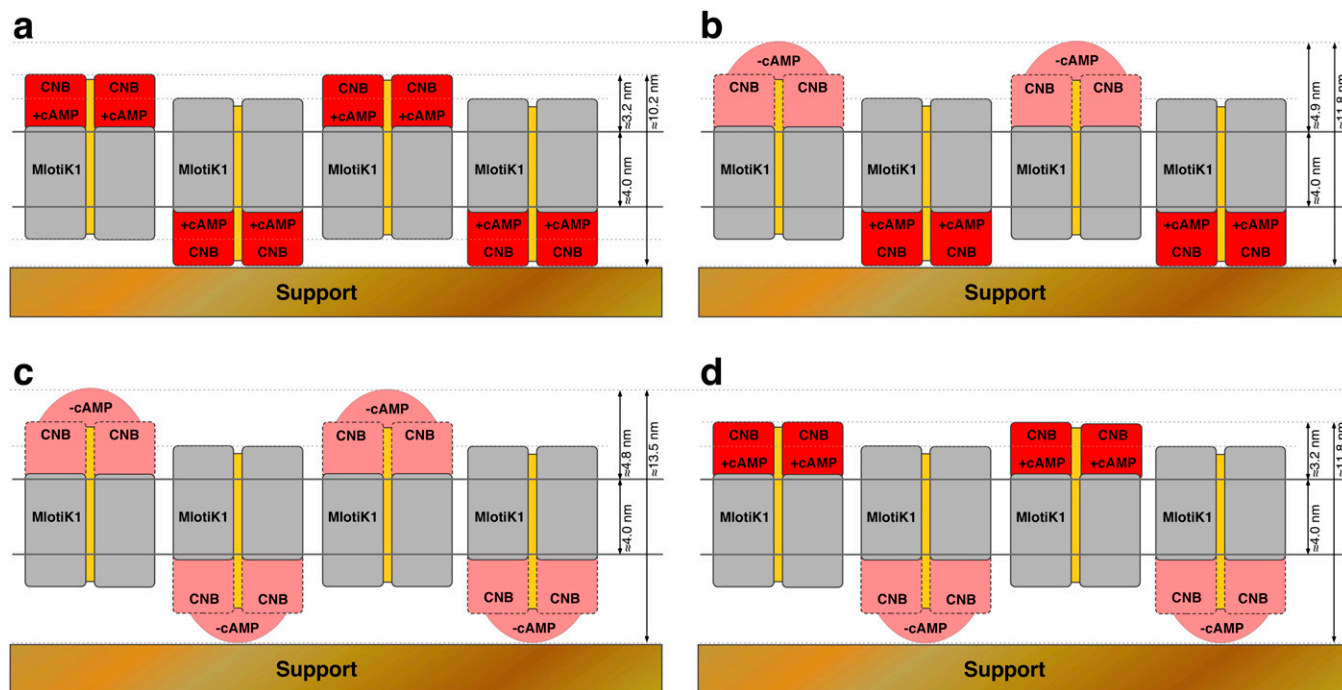

**Fig. S7.** Heights measured for reconstituted wt and mutant R348A MlotiK1 in the presence and absence of cAMP. (a) When prepared, adsorbed, and imaged in the presence of cAMP, wt and mutant MlotiK1 show the same heights within the errors of the AFM measurements (see Figs. S1 a and d and S3 and Table S1). The heights of wt MlotiK1 do not change after incubation and imaging in cAMP-free buffer (Figs. S1 a–c, S4, S5, and S6a and Table S1). (b) Mutant MlotiK1 membranes prepared and adsorbed in the presence of saturating cAMP concentrations but imaged in the absence of cAMP show an increased height of  $\sim 11.8$  nm (Fig. S1e and Table S1). This height change is attributable to conformational changes of the CNB domains facing the buffer solution (Fig. 3D and Figs. S8 and S9 and Table S1). Reincubating the cAMP-free mutant MlotiK1 (b) with cAMP reduces the membrane height to that measured for mutant and wt MlotiK1 membranes in the presence of cAMP (Figs. 3 A and G, Figs. S1f and S8 and Table S1). (c) When prepared, adsorbed, and imaged in the absence of cAMP, mutant MlotiK1 membranes show a height of  $\sim 13.5$  nm (Fig. S6b and Table S1). (d) Upon incubating the cAMP-free mutant MlotiK1 membranes (c) with saturating cAMP concentrations, the membranes show a height of  $\sim 11.8$  nm.

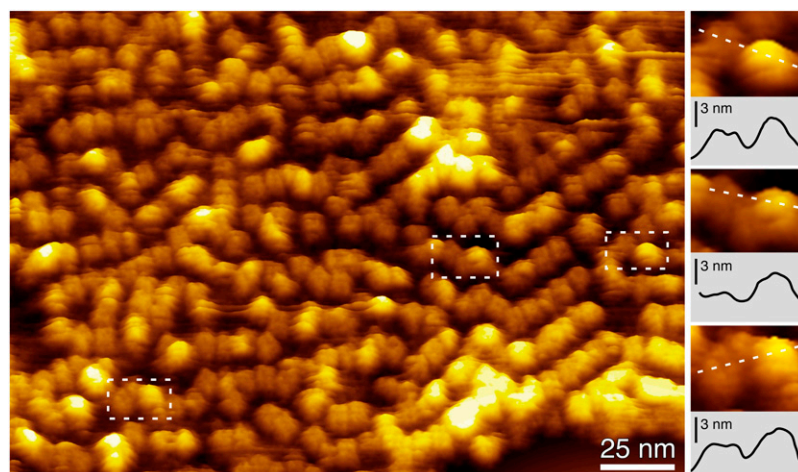

**Fig. S8.** High-resolution AFM topograph of mutant R348A MlotiK1 recorded after readdition of  $600 \mu\text{M}$  cAMP. After adsorption to the supporting mica, cAMP-bound mutant MlotiK1 membranes were incubated in cAMP-free buffer solution [50 mM KCl and 20 mM Tris-HCl (pH 7.5)] for several hours. In the absence of cAMP, the MlotiK1 tetramers undergo a conformational change and increase height (Fig. 3D). After this, the membranes were incubated with  $600 \mu\text{M}$  cAMP that was insufficient to saturate mutant MlotiK1. The AFM topograph shows an overview of MlotiK1 tetramers that coexist in two different conformational states. The lower protruding MlotiK1 tetramers (compare Figs. 1 and 3A) represent the cAMP-bound conformations, whereas the higher protrusions having the diameter of approximately one MlotiK1 tetramer ( $\sim 8$ – $10$  nm) represent the cAMP-unbound conformations. At fully saturating cAMP concentrations, all MlotiK1 tetramers ( $\sim 95\%$ ) are in the cAMP-bound conformations (Fig. 3G). The image on the right shows selected regions of the topograph at larger scale. These regions were taken from dashed rectangles indicated in the topograph. Below every selected region, we show a height profile (noise-filtered) that has been taken along the dashed line indicated. The height difference between lower-protruding (cAMP-bound) and higher-protruding (cAMP-unbound) MlotiK1 channels corresponds to  $\sim 1.7$  nm. The topographs show a full-color level corresponding to vertical height scale of 6 nm. The height analysis of cAMP-bound and cAMP-unbound mutant MlotiK1 channels is shown in Table S2. Imaging was 50 mM KCl,  $600 \mu\text{M}$  cAMP, and 20 mM Tris-HCl (pH 7.5).

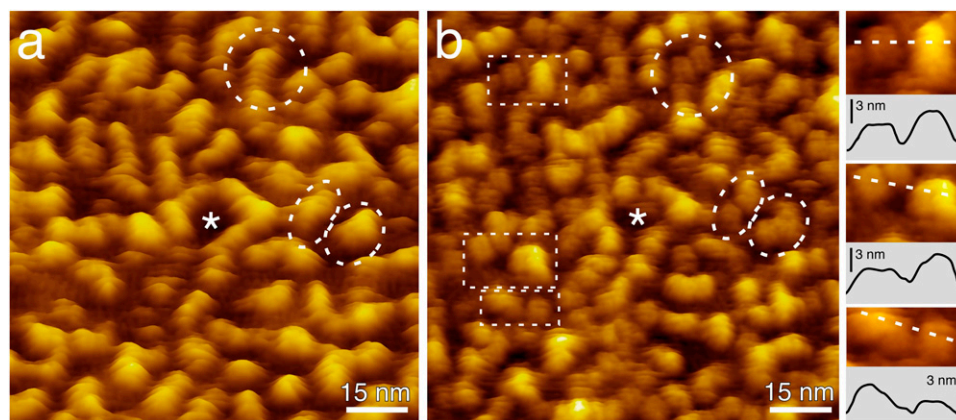

**Fig. S9.** Time-lapse AFM topographs of mutant R348A MlotiK1 recorded in the absence and presence of cAMP. (a) Mutant MlotiK1 channels recorded in cAMP-free buffer solution. After an incubation time of  $\sim 3$  h all channels increased height by  $\sim 1.7$  nm (see Fig. 3D and Table S2). (b) The same mutant MlotiK1 channels as in a recorded  $\sim 150$  min after readdition of  $600 \mu\text{M}$  cAMP. The asterisk highlights a reference area, and the dashed circles and ellipses highlight conformational changes of the same membrane area imaged in absence and presence of cAMP. The lower-protruding MlotiK1 tetramers represent the cAMP-bound conformations (compare Figs. 1 and 3A and Fig. S8), whereas the higher protrusions having the diameter of about one MlotiK1 tetramer represent the cAMP-unbound conformations (compare Fig. 3D and Fig. S8). Because mutant MlotiK1 was not fully saturated at  $600 \mu\text{M}$  cAMP, not all channels have re-adopted the cAMP-bound conformation. The image on the right shows selected regions of the MlotiK1 membrane at larger scale. These regions were taken from dashed rectangles indicated in the topograph b. Below every selected region, we show a height profile (noise-filtered) that has been taken along the dashed line indicated. The height difference between lower-protruding (cAMP-bound) and higher-protruding (cAMP-unbound) MlotiK1 channels corresponds to  $\sim 1.7$  nm. Topographs have full-color levels corresponding to a vertical height scale of 6 nm. Imaging buffer was 50 mM KCl, no cAMP (a),  $600 \mu\text{M}$  cAMP (b), and 20 mM Tris-HCl (pH 7.5).

**Table S1. Heights measured for wt and mutant R348A MlotiK1 membranes protruding from the mica support in the presence and absence of cAMP**

| Preparation/imaging | wt MlotiK1                       | Mutant MlotiK1                               |
|---------------------|----------------------------------|----------------------------------------------|
| +cAMP/+cAMP/+cAMP   | $10.2 \pm 0.8$ nm ( $n = 176$ )  | $10.1 \pm 0.8$ nm ( $n = 156$ )              |
| +cAMP/+cAMP/−cAMP   | $10.3 \pm 0.6$ nm ( $n = 163$ )* | $11.8 \pm 0.8$ nm ( $n = 147$ ) <sup>†</sup> |
| −cAMP/−cAMP/−cAMP   | $10.0 \pm 0.7$ nm ( $n = 105$ )* | $13.5 \pm 0.7$ nm ( $n = 153$ ) <sup>†</sup> |
| −cAMP/−cAMP/+cAMP   | —                                | $12.1 \pm 0.8$ nm ( $n = 39$ ) <sup>†</sup>  |

Average heights and SDs measured from a number ( $n$ ) of MlotiK1 membranes imaged by AFM. Sample preparation, adsorption, and imaging conditions were as follows:

+cAMP/+cAMP/+cAMP: MlotiK1 membranes were prepared in the presence of cAMP (see *Materials and Methods*), adsorbed in cAMP-containing buffer, and imaged in cAMP-containing buffer [ $200 \mu\text{M}$  cAMP (wt MlotiK1) or  $900 \mu\text{M}$  cAMP (mutant MlotiK1)].

+cAMP/+cAMP/−cAMP: MlotiK1 membranes were prepared in the presence of cAMP (see *Materials and Methods*), adsorbed in cAMP-containing buffer [ $200 \mu\text{M}$  cAMP (wt MlotiK1) or  $900 \mu\text{M}$  cAMP (mutant MlotiK1)], and imaged in cAMP-free buffer.

−cAMP/−cAMP/−cAMP: MlotiK1 membranes were prepared in the absence of cAMP (see *Materials and Methods*), adsorbed in cAMP-free buffer, and imaged in cAMP-free buffer.

−cAMP/−cAMP/+cAMP: MlotiK1 membranes were prepared in the absence of cAMP (see *Materials and Methods*), adsorbed in cAMP-free buffer, and imaged in cAMP-containing buffer ( $900 \mu\text{M}$  cAMP for mutant MlotiK1).

For every experimental condition listed, the statistical height analysis of MlotiK1 membranes was taken from membranes imaged in at least 12 independent experiments. For each experiment between 20 and 60 AFM, topographs of membranes have been recorded.

\*Indicates that the average height is not significantly different (Student  $t$  test) from the average height shown at the top of the row. Adsorption buffer: 200 mM KCl, 20 mM Tris-HCl (pH 7.5), and cAMP concentrations as indicated. Imaging buffer: 50 mM KCl, 20 mM Tris-HCl (pH 7.5), and cAMP concentrations as indicated.

<sup>†</sup>Indicates that the average height is significantly different (Student  $t$  test) from the average height shown at the top of the row (+cAMP/+cAMP/+cAMP).
